# Supplementary material
Source: PubMed Central journal article supplement (PMC3833685)

# CYPSEY

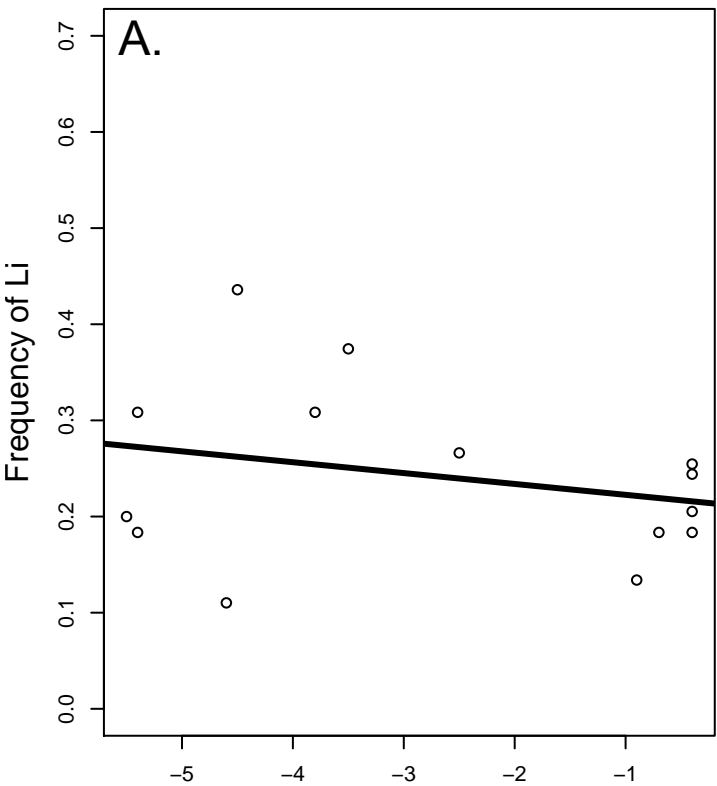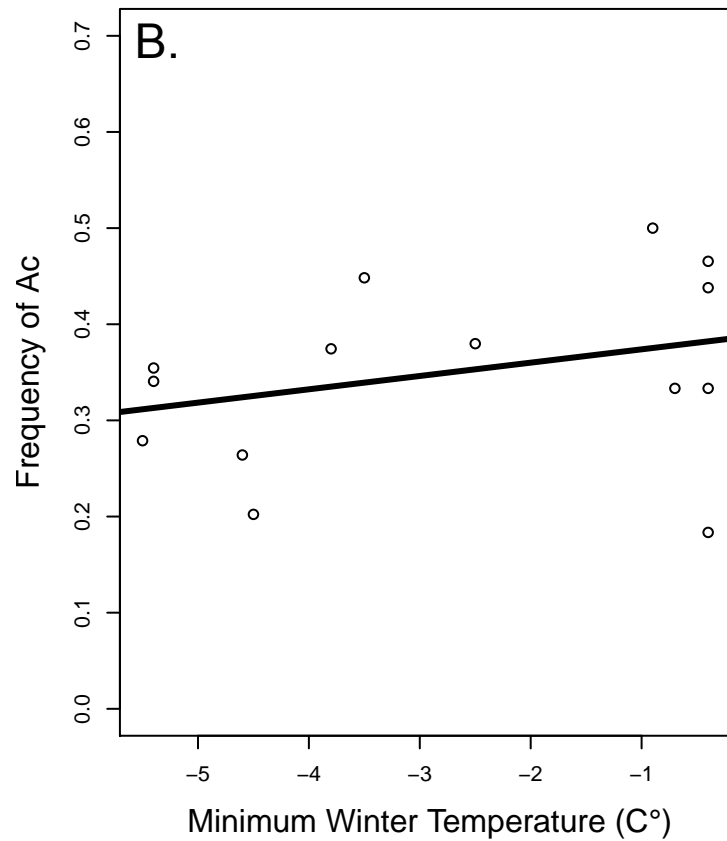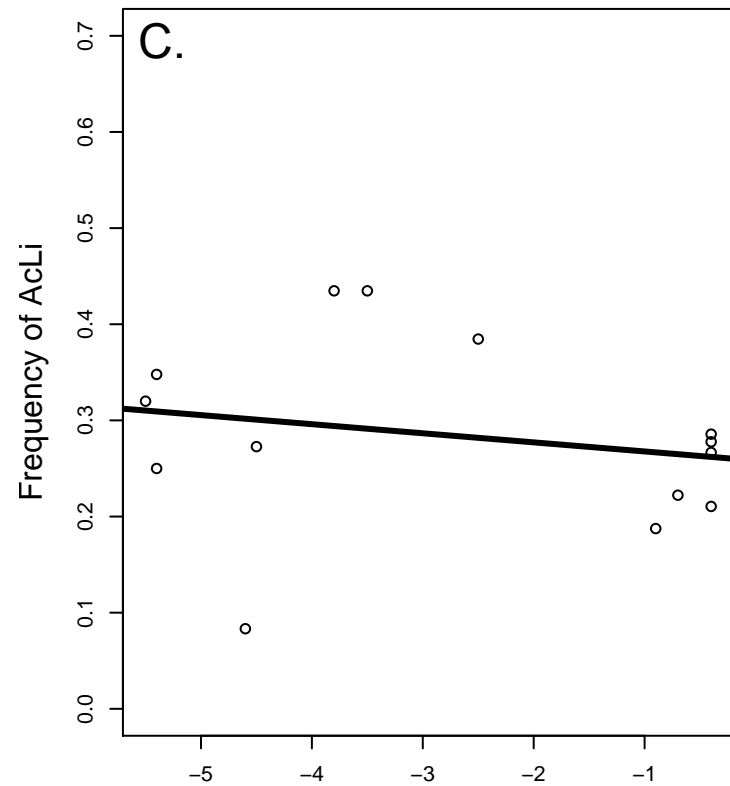

Supplement: hdy201371x1.pdf [file hdy201371x1.pdf]

# CYPSEY

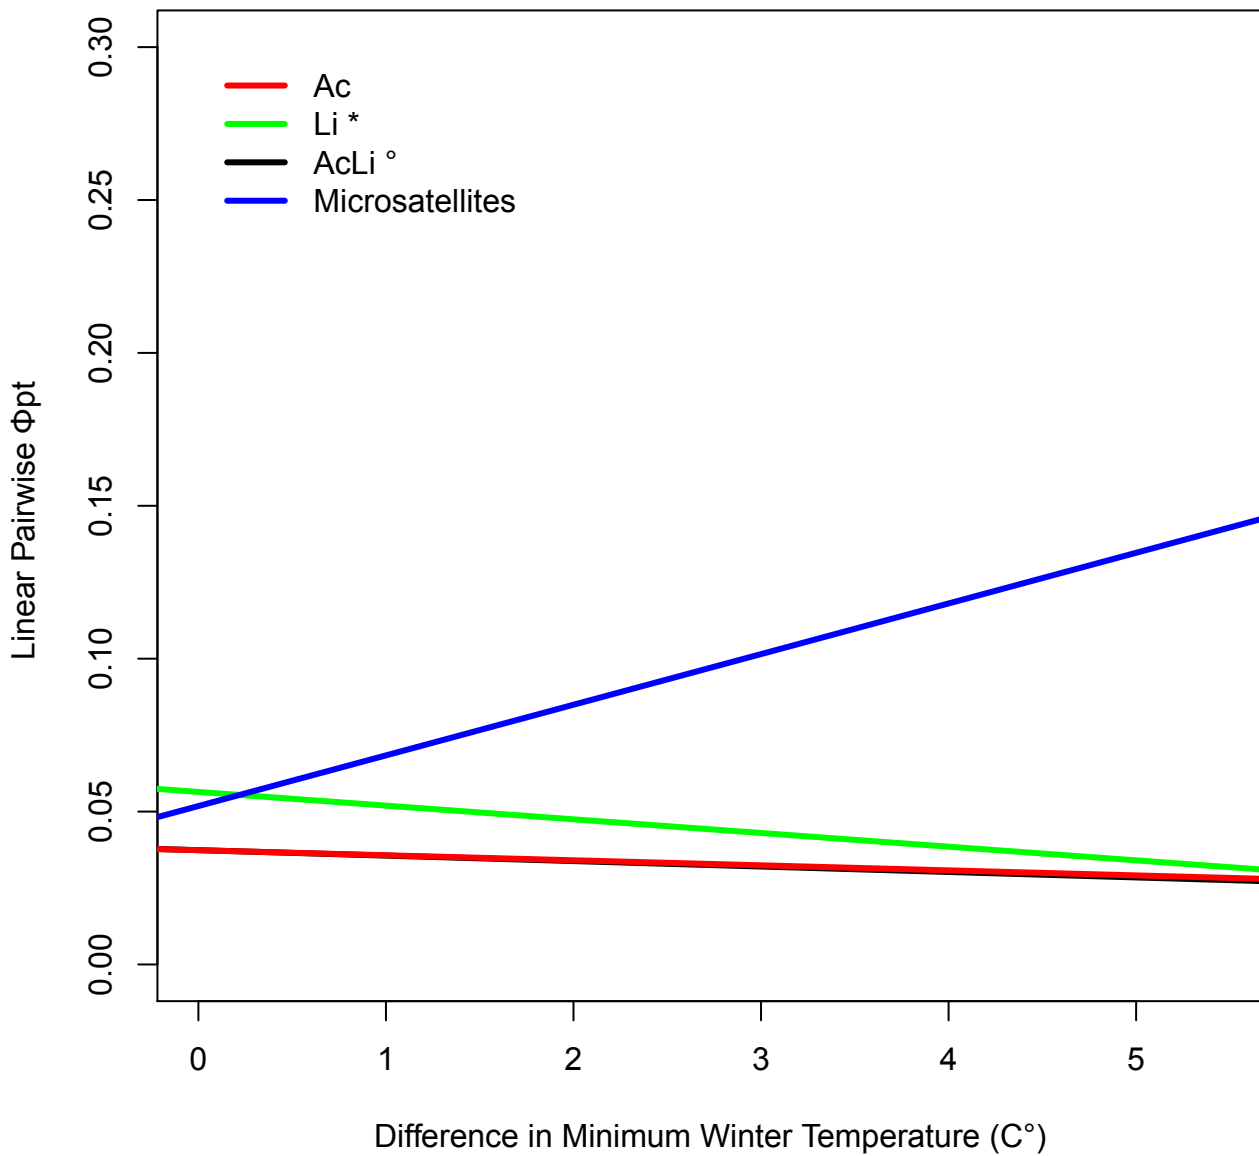

Supplement: hdy201371x2.pdf [file hdy201371x2.pdf]

## North Cascades with Pooled Transects

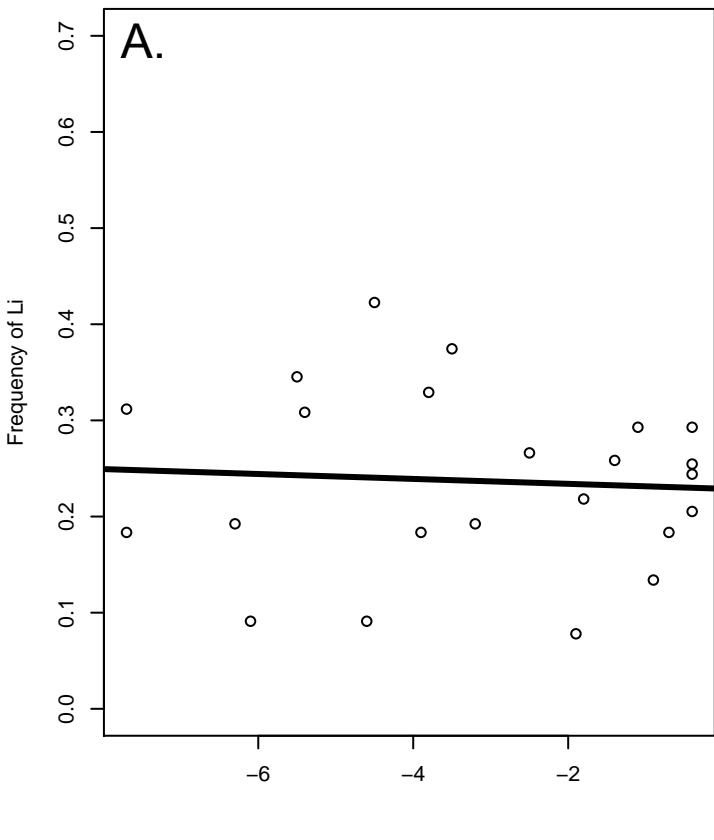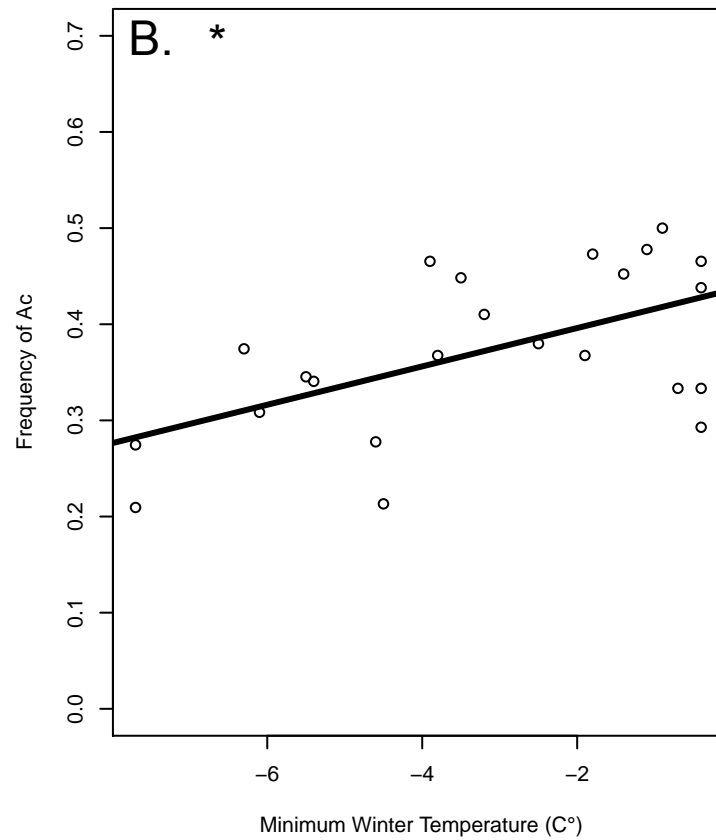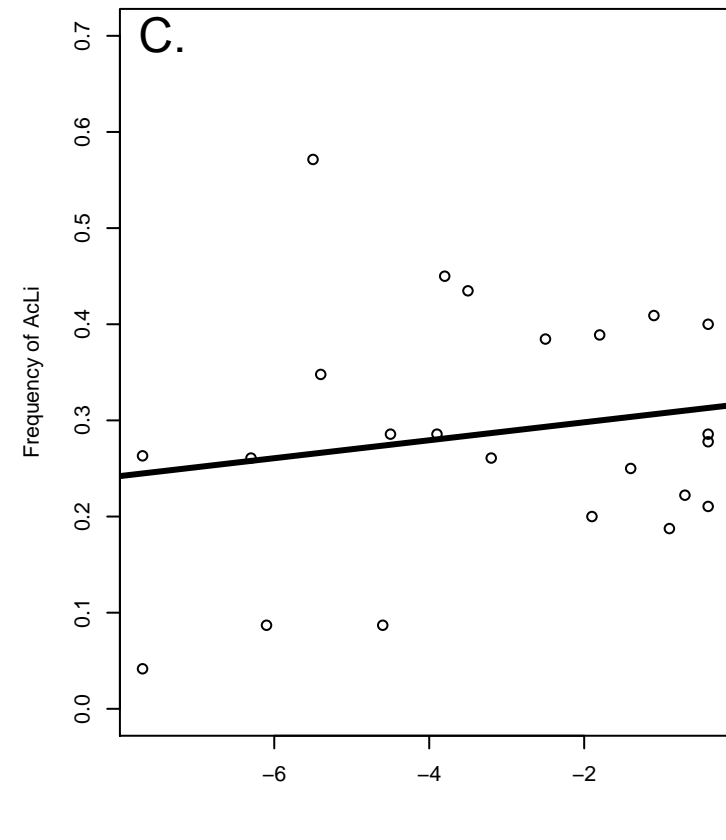

## North Cascades with Pooled Transects

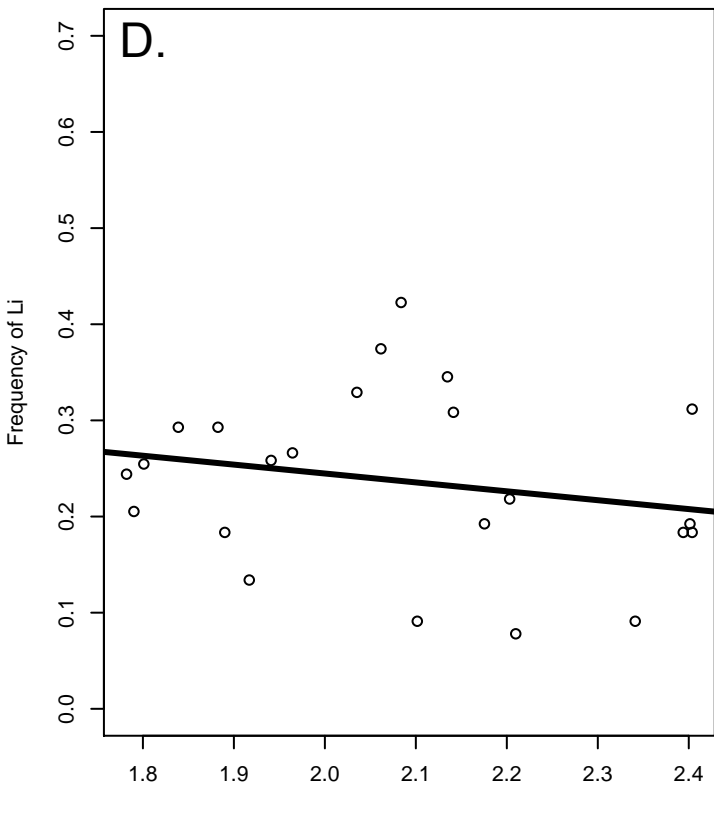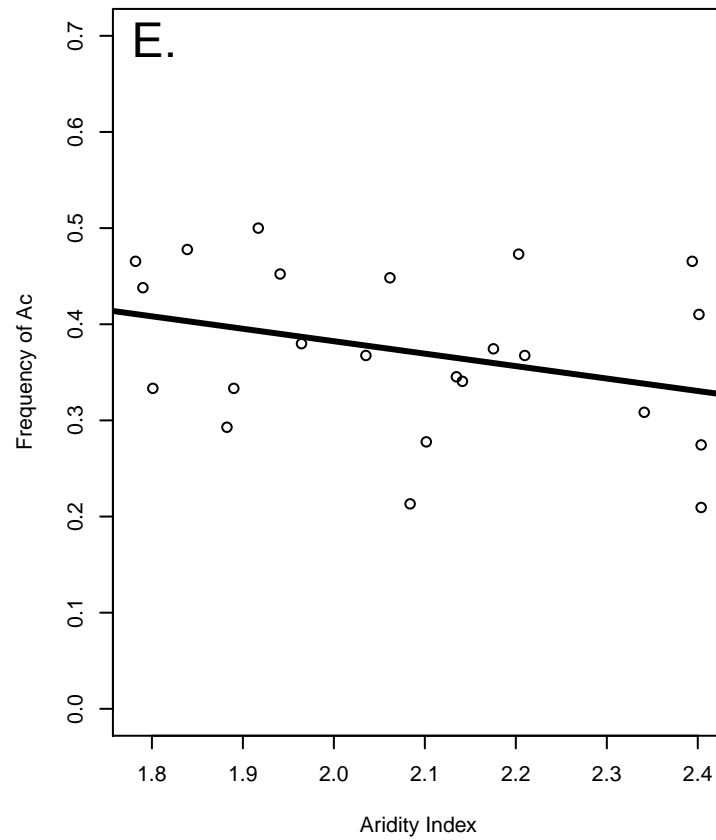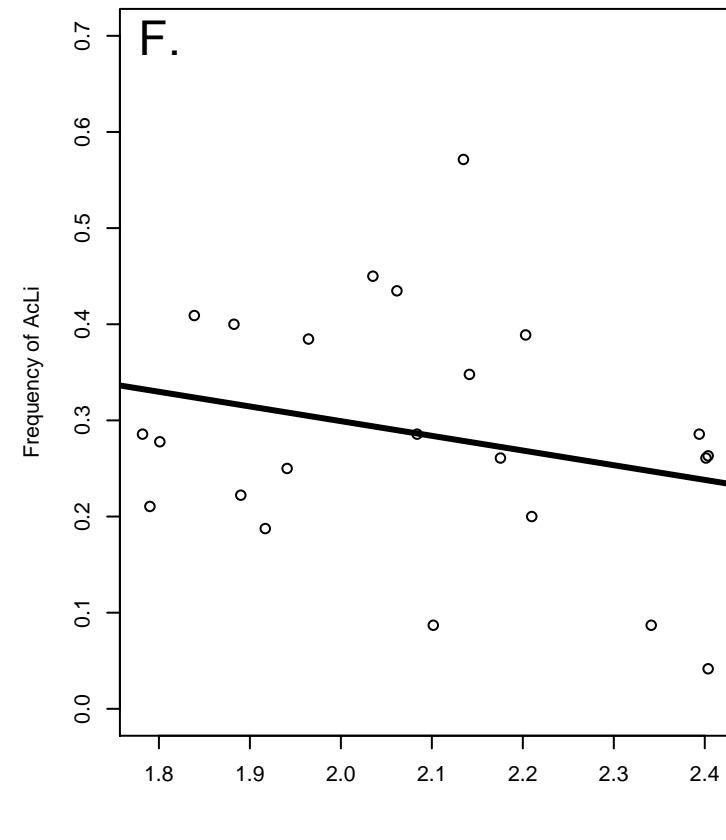

Supplement: hdy201371x3.pdf [file hdy201371x3.pdf]

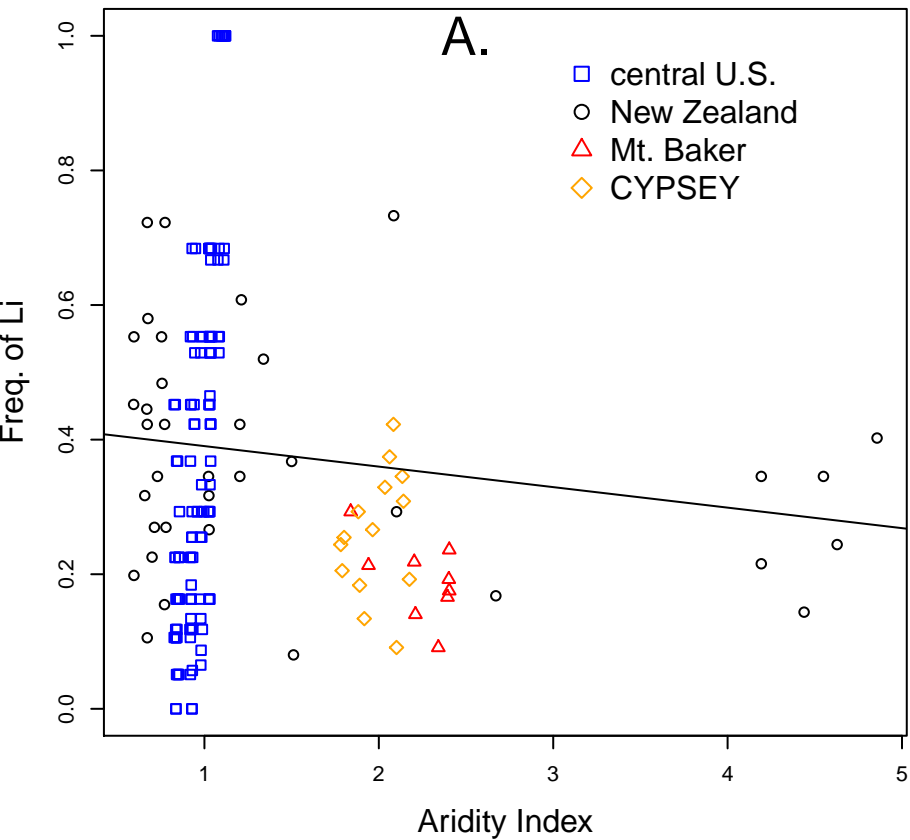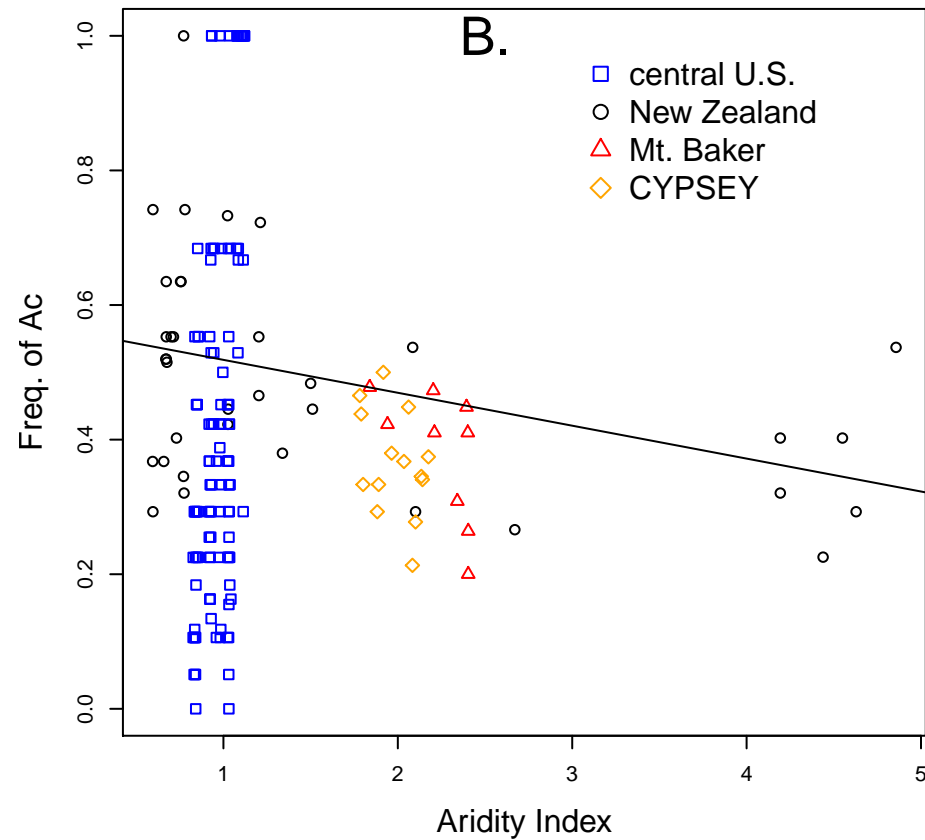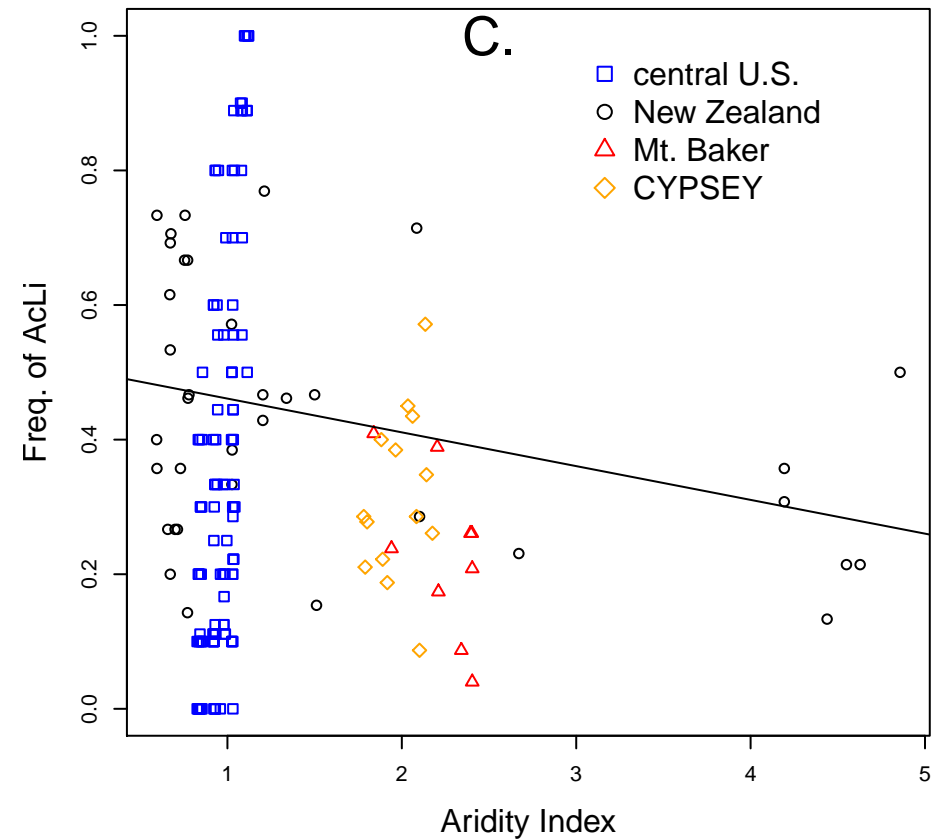

Supplement: hdy201371x4.pdf [file hdy201371x4.pdf]

## New Zealand

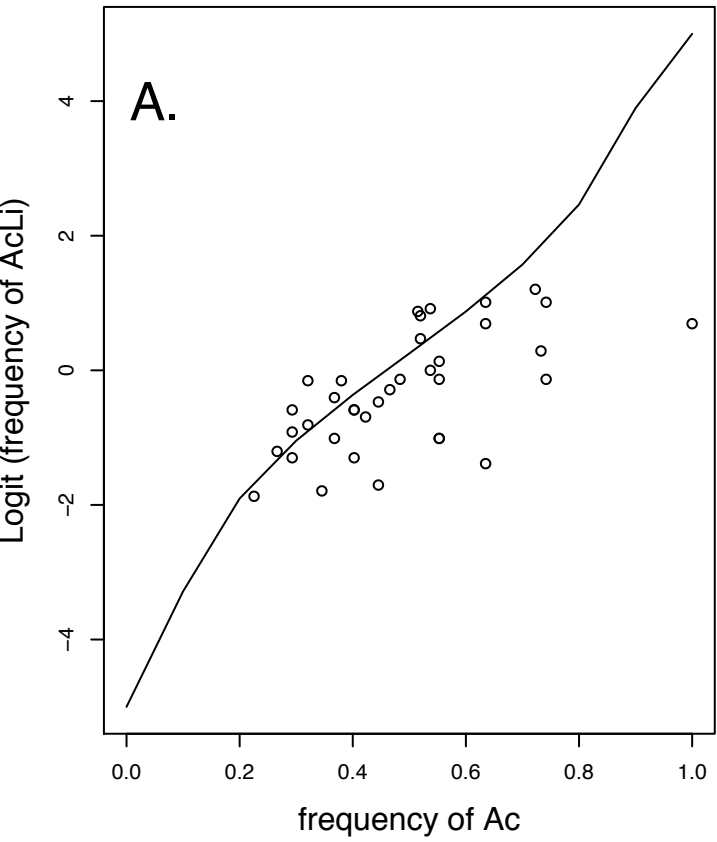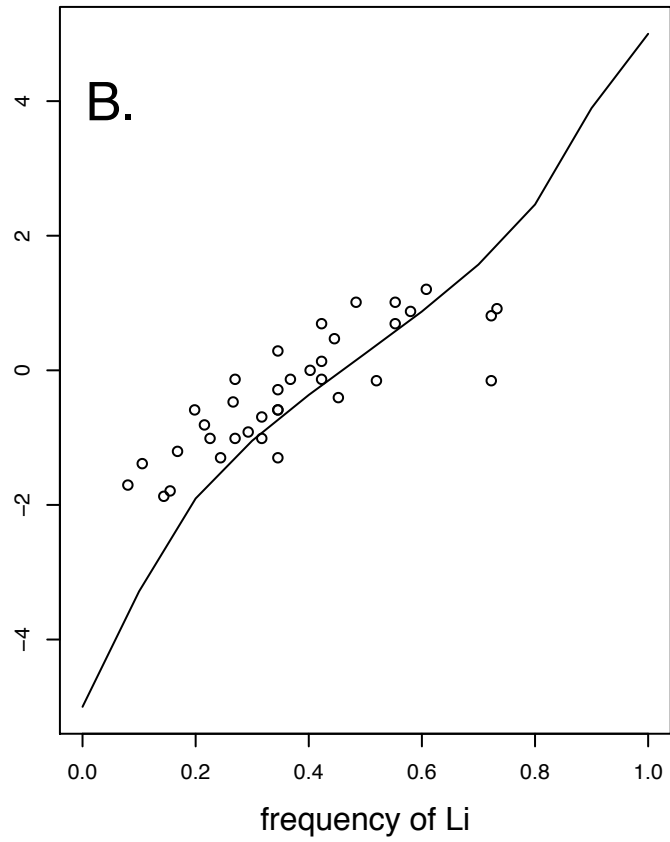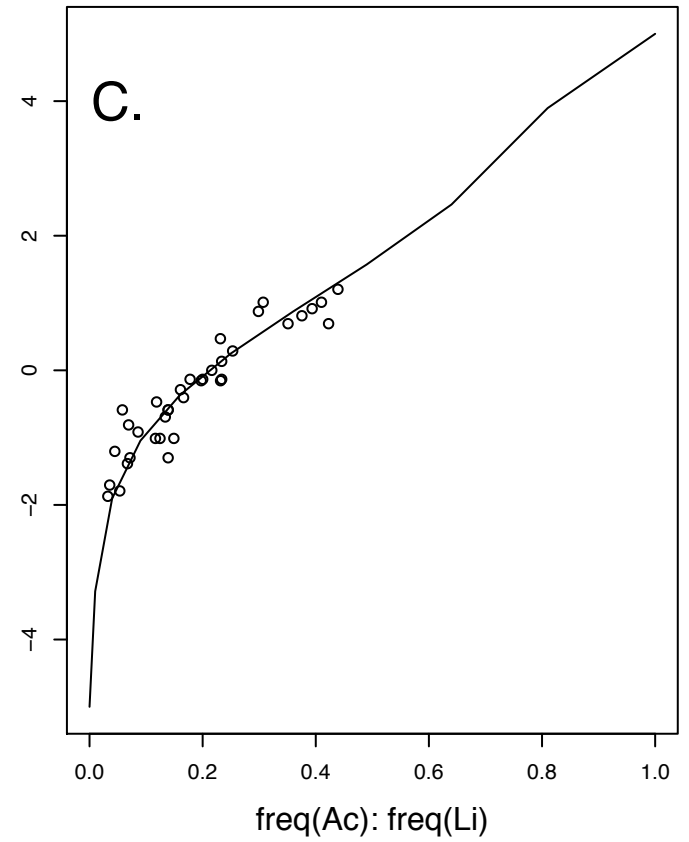

## Central U.S.

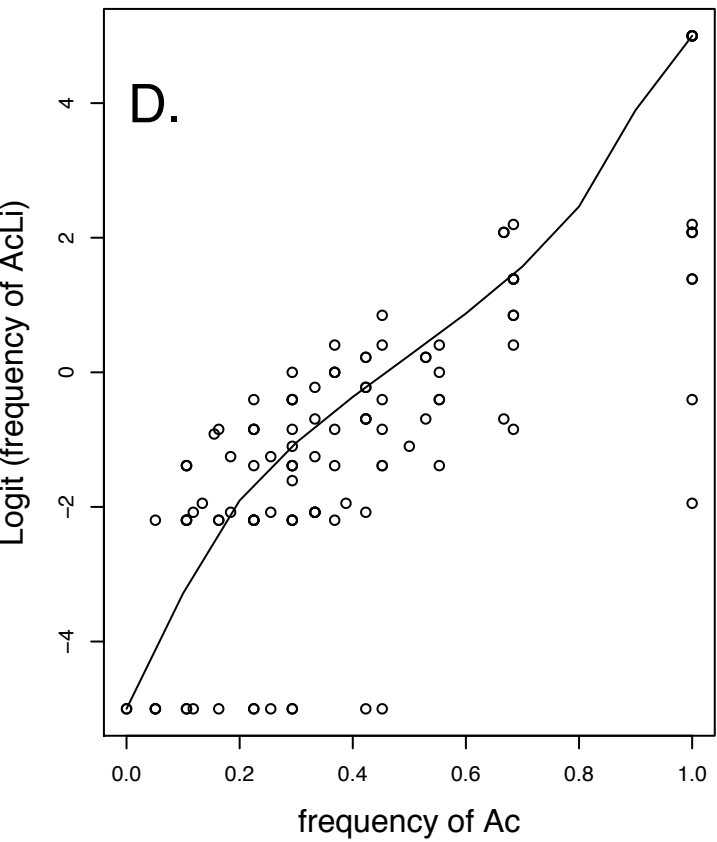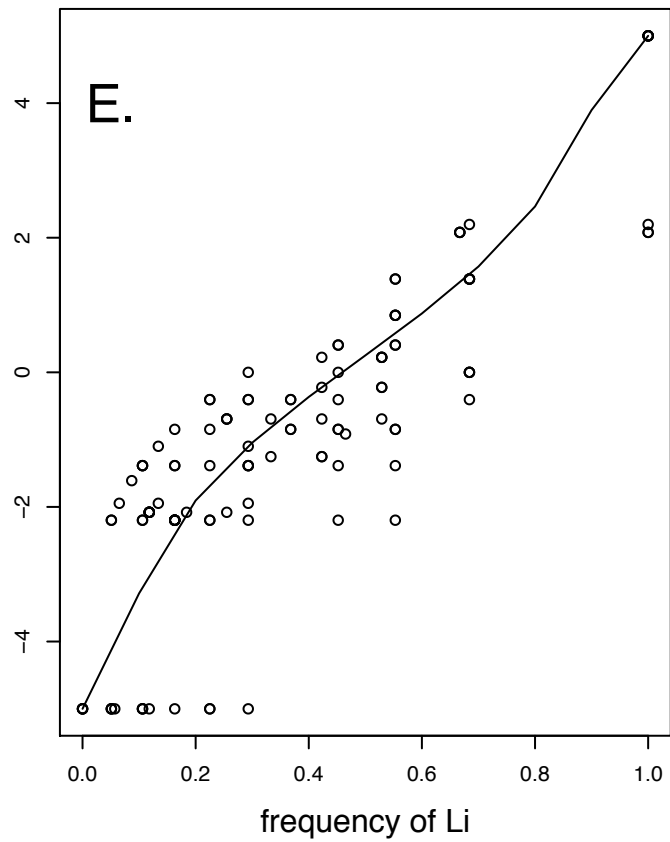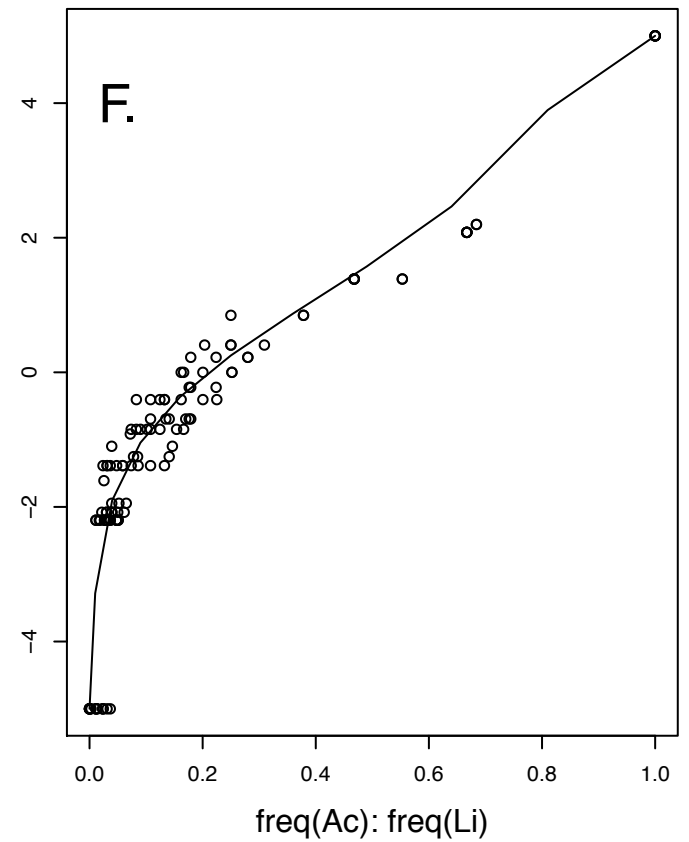

Supplement: hdy201371x5.pdf [file hdy201371x5.pdf]
